# Supplementary material
Source: Springer Nature journal article supplement (https://www.springermedizin.de/resource/supplementary/12993_2011_366_MOESM6_ESM.pdf/9617630)
Supplement: MOESM6 [file 9617630]

**A)****Freezing first 5 trials Shuttlebox**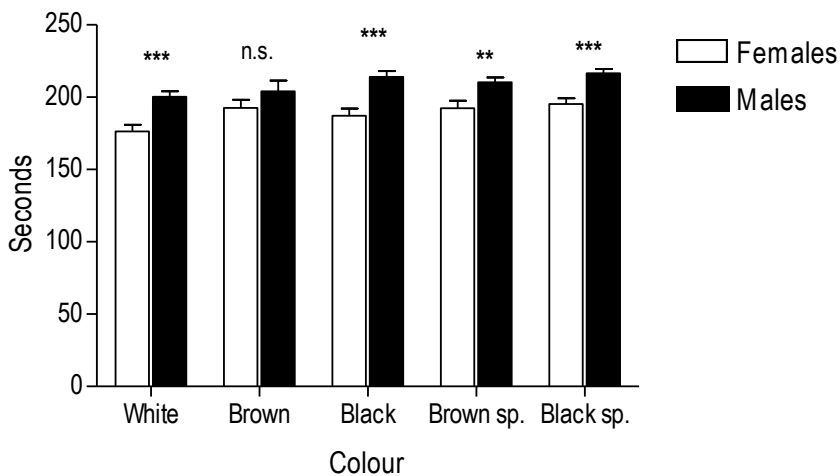

Post hoc Duncan's test ( $p < 0.05$ ) for "Colour":  
 "White" is different from "Black", "Brown sp" and "Black sp"

**B)****Avoidances+ITC in the Shuttlebox**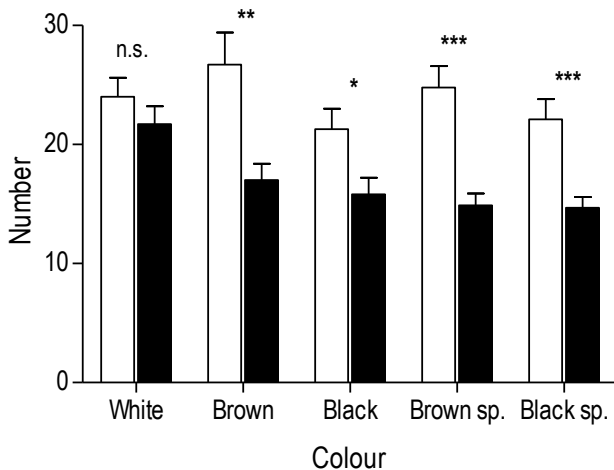

Post hoc Duncan's test ( $p < 0.05$ ) for "Colour":  
 "White" is different from "Black", "Brown sp" and "Black sp"
